# Supplementary material
Source: Research Square preprint supplement (doi:10.21203/rs.3.rs-8874344/v1)
Supplement: Supplementary file 1 [file 388cb01b9670d9412f55b8db.docx]

**Supporting Information**

**Hardware implementation of photonic neuromorphic autonomous navigation**

Yonghang Chen1, Shuiying Xiang1*, Xintao Zeng1, Mengting Yu1, Tao Zou1, Shangxuan Shi1, Xingxing Guo1, Yanan Han1, Yahui Zhang1*, and Yue Hao1

**Table of Contents**

1. Introduction to the Autonomous Navigation Task
2. Pseudocode of the Algorithm Workflow
3. Training Parameters of the Photonic Spiking TD3 Network for Neuromorphic Autonomous Navigation
4. Complete Input-Output Comparisons of Error Activations
5. Complete simulation results for all error-activated channels
6. References
7. Supplementary Videos
   1. Supplementary Video 1 | Real-time navigation demonstration of the robot under the non-obstacle scenario (Task 1).
   2. Supplementary Video 2 | Real-time navigation demonstration of the robot under the obstacle scenario (Task 2).

## Introduction to the Autonomous Navigation Task

The task is a mapless dynamic obstacle-avoidance navigation problem for a mobile robot, formulated within a reinforcement learning framework. In an unknown Gazebo simulation environment, the robot autonomously navigates from a randomly assigned start position to a randomly assigned goal position using only local sensor information, while avoiding collisions with obstacles [1, 2]. We begin by introducing the Gazebo simulation environment.

**Gazebo** is a high-fidelity 3D robotic simulation platform that employs the ODE (Open Dynamics Engine) physics engine to simulate realistic rigid-body dynamics, collision detection, and friction effects. It can accurately generate point cloud data for Velodyne 3D LiDAR sensors, and its simulation time is strictly synchronized with ROS to ensure timely execution of control commands. The simulation environment includes: (1) boundary walls that constrain the navigation area to a 10 m × 10 m square; (2) four dynamic cubic obstacles that can be randomly positioned; and (3) ground textures that provide a visual reference frame without affecting physical interactions.

**The simulated robot** is a two-wheeled differential-drive mobile platform equipped with a Velodyne VLP-16 3D LiDAR for 360° environmental perception. Control commands generated by the navigation algorithm are published via the ROS topic /r1/cmd_vel and translated by the actuators into the actual velocities of the left and right wheels to execute movement. Assuming that within a unit time the robot rotates about an instantaneous center located on its left side, its motion can be described by the following equations [3]:

|  | (S1) |
| --- | --- |

Here,  denotes the linear velocity of the robot’s center, and represent the linear velocities of the left and right drive wheels, is the angular velocity of the robot’s center, is the angle swept during the robot’s arc motion, and is the distance between the left and right drive wheels. Using Equation S1, the linear velocities of the left and right wheels can be computed as follows:

|  | (S2) |
| --- | --- |

Equations S1 and S2 can be expressed in matrix form, allowing to be fed back to the localization module to compute the robot’s real-time pose. By combining the left- and right-wheel radii, can be converted into the rotational speeds of the drive motors, as shown below:

|  | (S3) |
| --- | --- |

**The state space** is a 24-dimensional continuous vector, comprising sensor data and the robot’s own state. The Velodyne 3D LiDAR point cloud is projected onto a 2D plane and the 360° field of view is evenly divided into 20 sectors (each 18°). The minimum obstacle distance within each sector is extracted to form the LiDAR perception vector (20 dimensions), with values ranging from 0 to 10 m; distances exceeding 10 m are clipped to 10 m. The robot state consists of 4 dimensions: the Euclidean distance from the current position to the target, the relative angle between the robot’s current heading and the target direction (ranging from -π to π radians), the current linear velocity (m/s), and the current angular velocity (rad/s).

**The action space** is a 2-dimensional continuous vector, corresponding to the robot’s motion control commands: 1) linear velocity, normalized to the range [0, 1] m/s; 2) angular velocity, ranging from -1 to 1 rad/s, where positive values indicate counterclockwise rotation.

**The reward function** combines sparse and dense rewards to balance learning efficiency and policy quality, as defined by the following equation:

|  | (S4) |
| --- | --- |

Here,  denotes the Euclidean distance between the robot and the goal,  represents the minimum obstacle distance detected by the LiDAR,  is the normalized linear velocity, and is the angular velocity. The safety reward term is given by:

|  | (S5) |
| --- | --- |

**The termination conditions** are defined as reaching the target, colliding with an obstacle, or exceeding the maximum time limit, and can be expressed as follows:

|  | (S6) |
| --- | --- |

Here, the success threshold for  is 0.3 m, while the collision threshold for is 0.35 m. The current episode time step is denoted as , with a maximum limit of 500 steps.

## Pseudocode of the Algorithm Workflow

We present the pseudocode of the photonic spiking TD3 network, as shown below.

## Training Parameters of the Photonic Spiking TD3 Network for Neuromorphic Autonomous Navigation

The simulation environment is built on ROS Noetic Ninjemys running on Ubuntu 20.04.6 LTS. Model training and inference are performed on a hardware platform equipped with an Intel(R) Xeon(R) Platinum 8251 CPU @ 3.80 GHz and a single NVIDIA GeForce RTX 4090 GPU. The simulation environment and training parameters used in this study are summarized in Table S1 [4].

**Table S1.** The parameters used in the training of photonic spiking TD3 network

| **Category** | **Parameter** | **Value** |
| --- | --- | --- |
| Environment | Linear velocity range | [0, 1] m/s |
| Angular velocity range | [-1, 1] rad/s |
| Obstacle detection distance | < 0.6 m |
| Maximum episode steps | 500 |
| Laser range | [0, 30] m |
| Laser resolution | [180, 360] points |
| Update frequency | [10, 30] Hz |
| State dimension | 24 |
| Action dimension | 2 |
| Hidden dimension | 128 |
| Training | Total maximum training timesteps | 5,000,000 |
| Maximum steps | 500 |
| LIF timestep | 1 |
| Batch size | 1152 |
| Discount factor for future rewards | 0.99999 |
| Soft target update coefficient | 0.005 |
| Noise added to target policy for exploration | 0.2 |
| Maximum clipping value for exploration noise | 0.5 |
| Frequency of policy updates relative to critic | 2 |
| Replay buffer capacity | 2,000,000 |
| Initial exploration noise level | 1 |
| Minimum exploration noise level | 0.1 |
| Steps over which exploration noise decays | 500,000 |
| Maximum number of training epochs | 1000 |
| Optimizer | Adam |
| Actor and critic learning rate | 0.001 |

## Complete Input-Output Comparisons of Error Activations

This section presents the complete input-output comparisons of error activations for the two task scenarios. Figure S1 presents the input-output comparisons for Task 1, corresponding to the navigation scenario without obstacle interference. Figure S1(a1)-(a2) compares the experimental inputs and outputs for channel 69, where the DFB-SA laser failed to generate a spike at 0.43 µs. Figure S1(b1)-(b2) shows that the DFB-SA laser remained inactive at 2.20 µs for channel 115, while Figure S1(c1)-(c2) depicts an overactivated spike at 0.58 µs for channel 127.


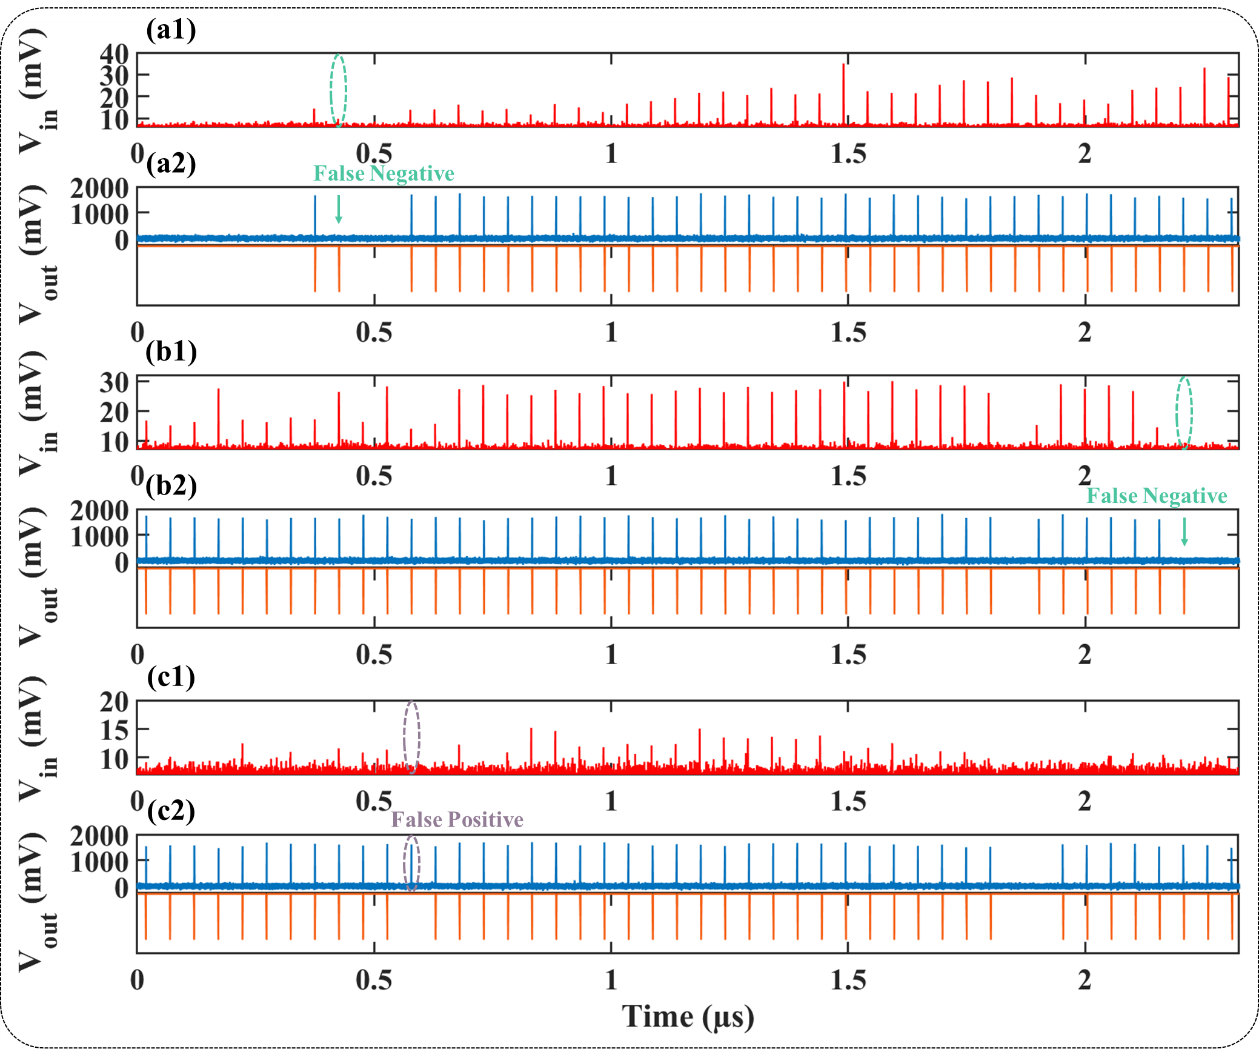


**Figure S1.** Experimental input-output comparisons of Channels 69, 115, and 127 in Task 1

Figure S2 presents the input-output comparisons for Task 2, corresponding to the navigation scenario with obstacle interference. Figure S2(a1)-(a2) compares the experimental inputs and outputs for channel 56, where the DFB-SA laser failed to generate a spike at 1.49 µs. Figure S2(b1)-(b2) shows the results for channel 114, in which the DFB-SA laser exhibited an overactivated spike at 1.12 µs and a missing spike at 1.42 µs. Figure S2(c1)-(c2) illustrates the case of channel 123, where the DFB-SA laser remained inactive at 2.09 µs, 2.12 µs, and 2.14 µs. Figure S2(d1)-(d2) depicts the input-output comparison for channel 127, showing that the DFB-SA laser failed to generate a spike at 1.87 µs.


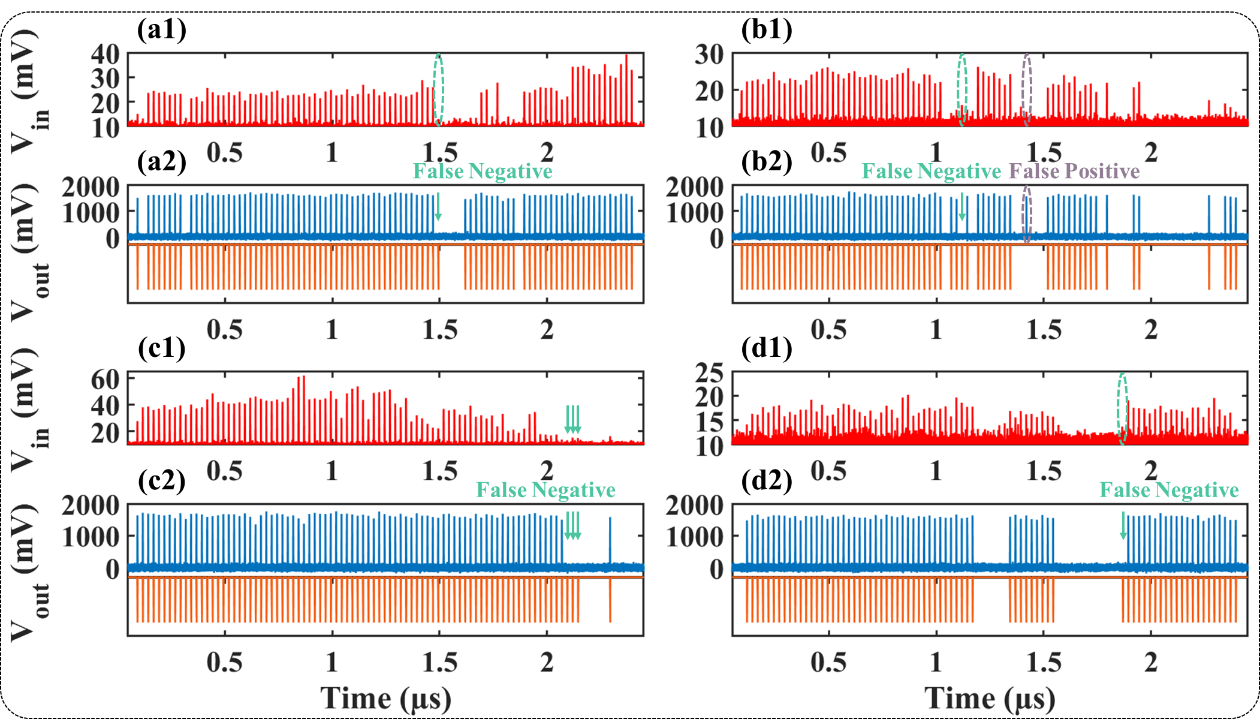


**Figure S2.** Experimental input-output comparisons of Channels 56, 114, 123 and 127 in Task 2

Missing spikes in the DFB-SA laser are mainly caused by input optical powers that fail to reach, or only marginally exceed, the effective activation threshold at the target excitation time, making spike generation highly sensitive to system fluctuations. Conversely, overactivated spikes arise when input signals with amplitudes near the threshold boundary are pushed above the effective threshold by instantaneous perturbations. Both phenomena originate from unavoidable fluctuations in the experimental system, including power instability in the MZM, transient variations in fiber coupling loss, and dynamic drift of the DFB-SA activation threshold induced by driving current and temperature variations.

## Complete simulation results for all error-activated channels

This section presents the complete simulation results of all error-activated channels for both tasks. Subplots with subscript 1 represent the externally injected optical signals, subscript 2 shows the outputs of the DFB-SA laser, subscript 3 depicts the carrier density in the gain region, and subscript 4 denotes the carrier density in the saturable absorber.

**
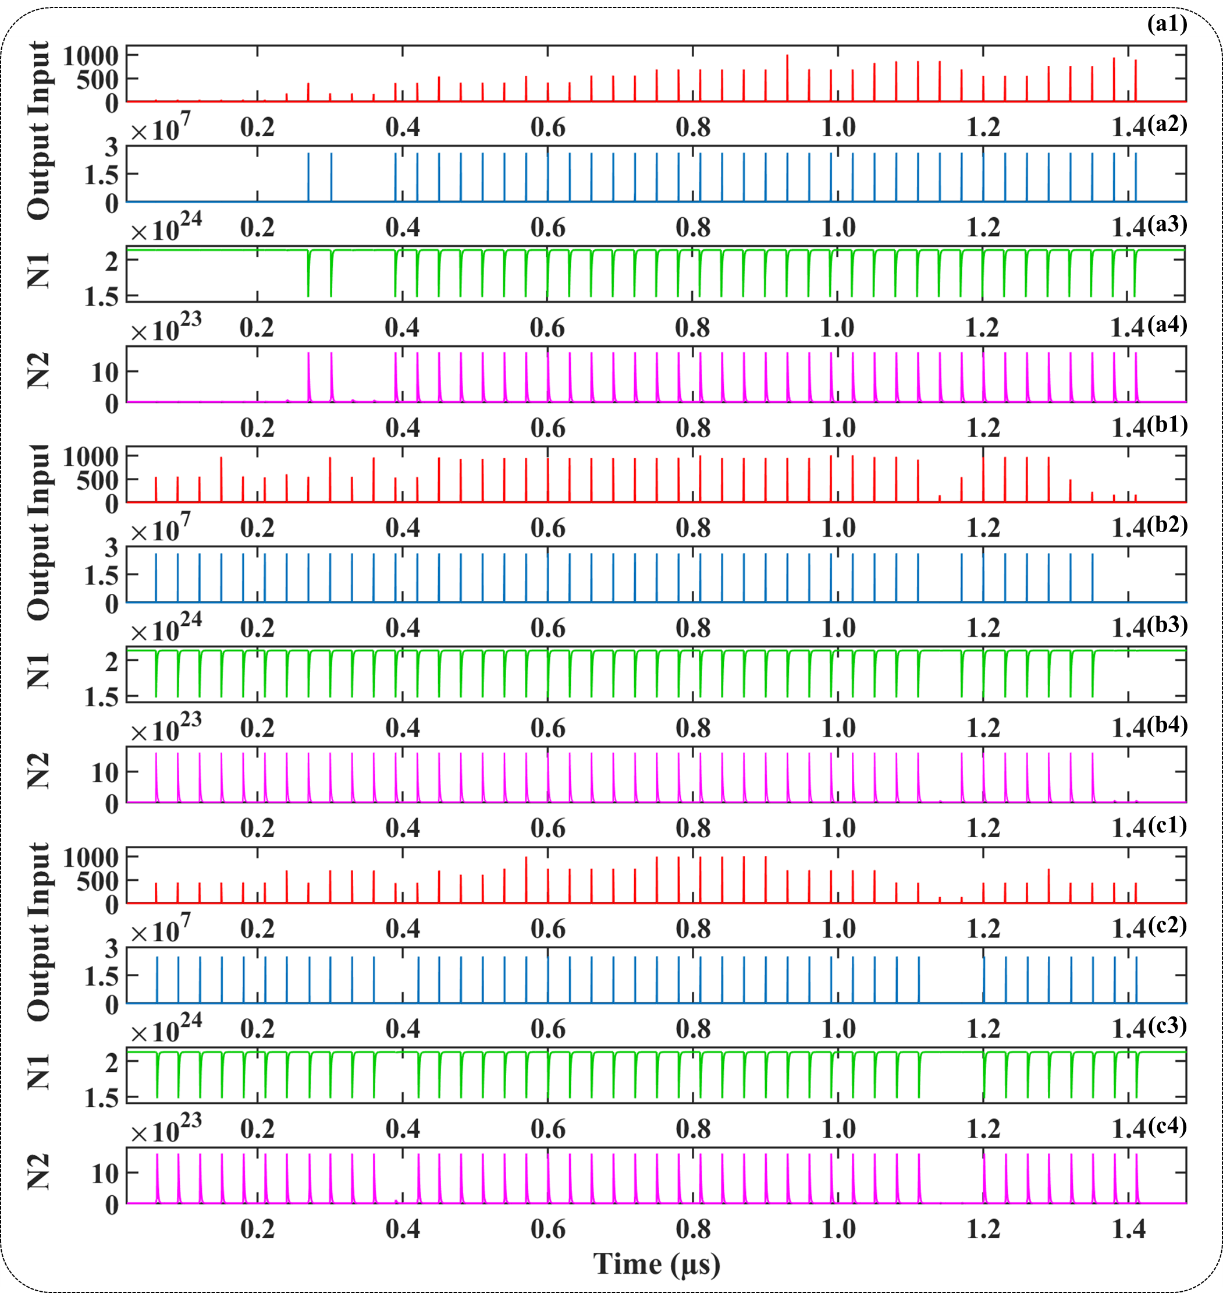
**

**Figure S3.** Simulation resultsof Channels 69, 115, and 127 in Task 1

Figure S3 presents the simulation results for all error-activated channels in Task 1, where panels (a), (b), and (c) correspond to Channels 69, 115, and 127, respectively. Figure S4 shows the simulation results for all error-activated channels in Task 2, where panels (a), (b), (c), and (d) correspond to Channels 56, 114, 123, and 127, respectively. The results indicate that the Yamada model-based simulations of the error-activated channels are fully consistent with the expected outputs, further verifying the theoretical feasibility of accurate DFB-SA laser activation.


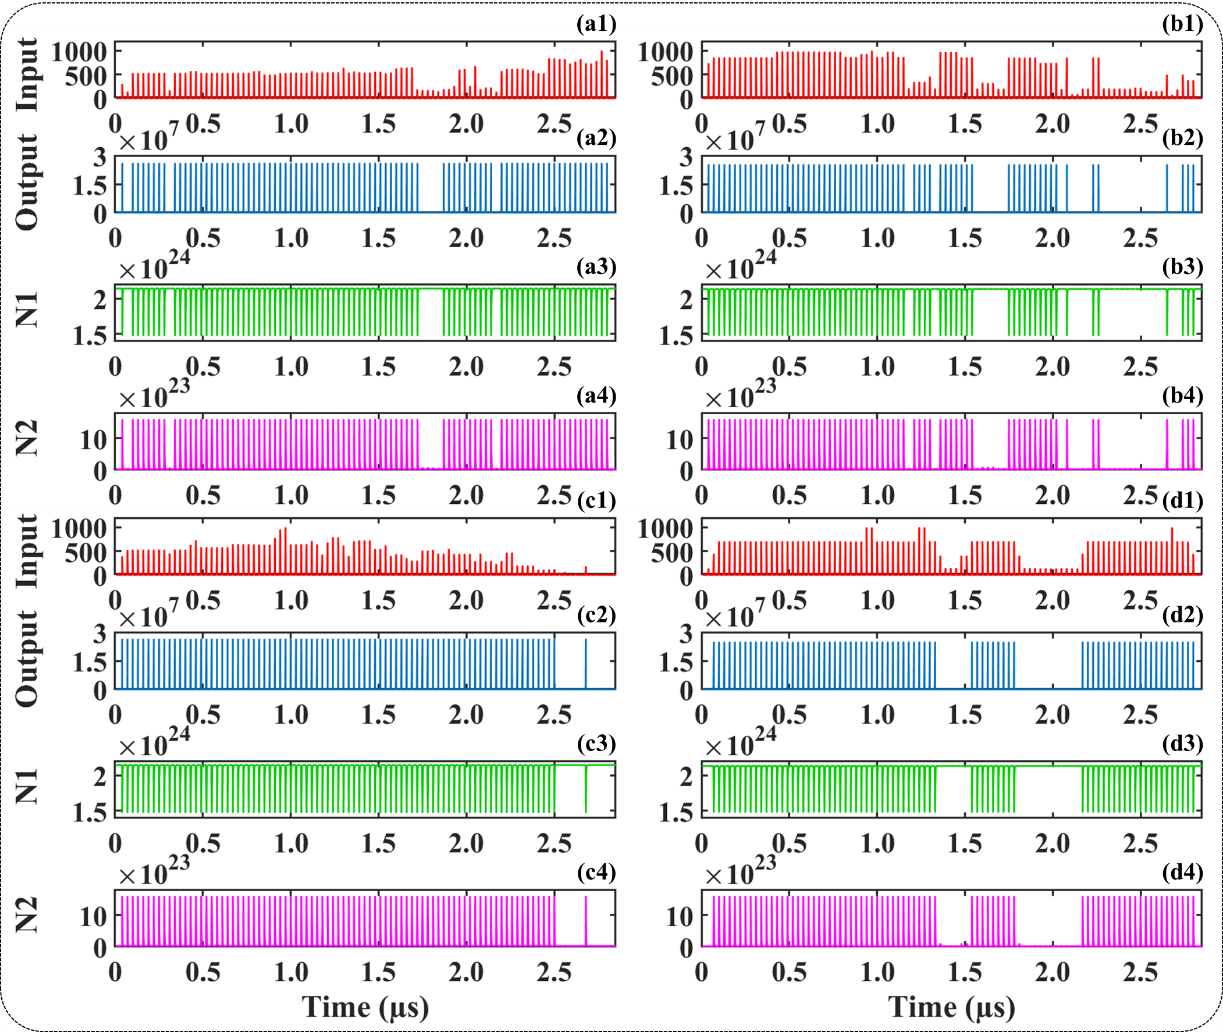


**Figure S4.** Simulation resultsof Channels 56, 114, 123 and 127 in Task 2

## References

1. Koenig, N. & Howard, A. Design and use paradigms for gazebo, an open-source multi-robot simulator. In *Proc. IEEE/RSJ Int. Conf. Intell. Robots Syst.*, 2149-2154 (2004).
2. Takaya, K. et al. Simulation environment for mobile robots testing using ROS and Gazebo. In *Proc. 20th Int. Conf. Syst. Theory Control Comput.*, 96-101 (2016).
3. Siegwart, R. et al. Introduction to Autonomous Mobile Robots. (MIT Press, 2011).
4. Cimurs, R. et al. Goal-driven autonomous exploration through deep reinforcement learning. *IEEE Robot. Autom. Lett.* **7**, 730 (2021).
